# Supplementary material for: Safety and Efficacy of Apixaban vs Enoxaparin for Preventing Postoperative Venous Thromboembolism in Women Undergoing Surgery for Gynecologic Malignant Neoplasm: A Randomized Clinical Trial
Source: PubMed Central journal article supplement — JAMA Netw Open. 2020 Jun 26;3(6):e207410. doi: 10.1001/jamanetworkopen.2020.7410 (PMC7320298; doi:10.1001/jamanetworkopen.2020.7410), 2020-06-26
Supplement: jamanetwopen-3-e207410-s002.pdf [file jamanetwopen-3-e207410-s002.pdf]

## Supplementary Online Content

Guntupalli SR, Brennecke A, Behbakht K, et al. Safety and efficacy of apixaban vs enoxaparin for preventing postoperative venous thromboembolism in women undergoing surgery for gynecologic malignant neoplasm: a randomized clinical trial. *JAMA Netw Open*. 2020;3(6):e207410. doi:10.1001/jamanetworkopen.2020.7410

**eTable 1.** Description of Major Bleeding and Venous Thromboembolic Events

**eTable 2.** Grade Level of Related and Anticipated Adverse Events

**eFigure.** Treatment Diagram

This supplementary material has been provided by the authors to give readers additional information about their work.

**eTable 1. Description of Major Bleeding and Venous Thromboembolic Events**

| Patients                    | Event   | Post-Operative Day | Surgery type                                   | Treatment Arm |
|-----------------------------|---------|--------------------|------------------------------------------------|---------------|
| <b>Major Bleeding Event</b> |         |                    |                                                |               |
| Patient 1                   |         | 2                  | Robotic assisted hysterectomy, BSO             | apixaban      |
| Patient 2                   |         | 4                  | Abdominal hysterectomy BSO, tumor debulking    | enoxaparin    |
| <b>VTE Event</b>            |         |                    |                                                |               |
| Patient 1                   | PE      | 4                  | Tumor debulking, omentectomy                   | apixaban      |
| Patient 2                   | DVT     | 32                 | Radical hysterectomy, BSO, tumor debulking     | enoxaparin    |
| Patient 3                   | DVT, PE | 69                 | Radical vulvectomy, bilateral groin dissection | apixaban      |
| Patient 4                   | DVT     | 65                 | Abdominal hysterectomy BSO, tumor debulking    | enoxaparin    |
| Patient 5                   | DVT     | 52                 | Laparotomy loop colostomy                      | enoxaparin    |

**eTable 2. Grade Level of Related and Anticipated Adverse Events**

| Adverse Event                                 | Any (n=400) | Grade 3  | Grade 4 | Grade 5 |
|-----------------------------------------------|-------------|----------|---------|---------|
| Clinically relevant non-major bleeding events |             |          |         |         |
| Hematoma                                      | 5 (<1.0)    | 1 (<1.0) | 0       | 0       |
| Bruising                                      | 15 (3.8)    | 0        | 0       | 0       |
| Epistaxis                                     | 5 (<1.0)    | 0        | 0       | 0       |
| Vaginal spotting/discharge/bleeding           | 4 (<1.0)    | 1 (<1.0) | 0       | 0       |
| Wound infection                               | 6 (1.5)     | 11 (2.8) | 0       | 0       |
| Dizziness                                     | 11 (2.8)    | 0        | 0       | 0       |
| Suspected allergic reaction                   | 2 (<1.0)    | 0        | 0       | 0       |
| Arthralgia                                    | 9 (2.3)     | 0        | 0       | 0       |
| Skin rash/cellulitis                          | 3 (<1.0)    | 0        | 0       | 0       |
| Abscess/discharge from incision               | 0           | 2 (<1.0) | 0       | 0       |
| Headache                                      | 12 (3.0)    | 0        | 0       | 0       |

Values reported are n (%)

## eFigure. Treatment Diagram

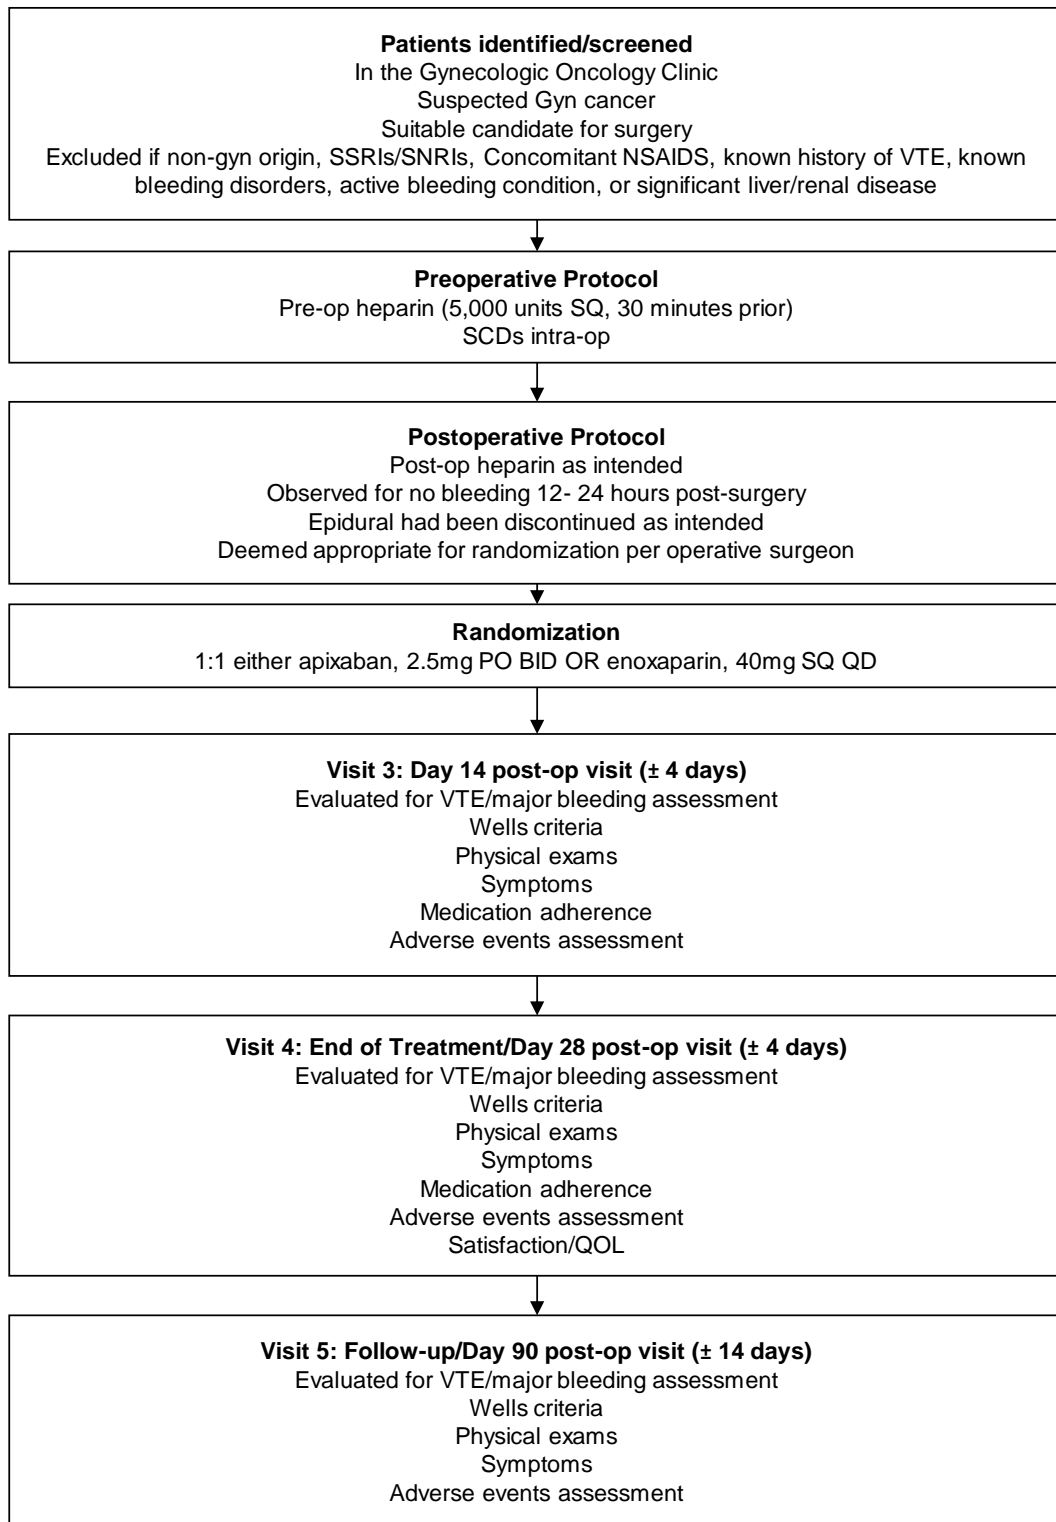

Flow diagram of protocol treatment plan.
