# Supplementary material for: Safety and Efficacy of Apixaban vs Enoxaparin for Preventing Postoperative Venous Thromboembolism in Women Undergoing Surgery for Gynecologic Malignant Neoplasm: A Randomized Clinical Trial
Source: PubMed Central journal article supplement — JAMA Netw Open. 2020 Jun 26;3(6):e207410. doi: 10.1001/jamanetworkopen.2020.7410 (PMC7320298; doi:10.1001/jamanetworkopen.2020.7410), 2020-06-26
Supplement: jamanetwopen-3-e207410-s003.pdf [file jamanetwopen-3-e207410-s003.pdf]

## Data Sharing Statement

Guntupalli. Safety and Efficacy of Apixaban vs Enoxaparin for Preventing Postoperative Venous Thromboembolism in Women Undergoing Surgery for Gynecologic Malignant Neoplasm. *JAMA Netw Open*. Published June 26, 2020. 10.1001/jamanetworkopen.2020.7410

### Data

**Data available:** Yes

**Data types:** Deidentified participant data

**How to access data:** RedCap database

**When available:** With publication

### Supporting Documents

**Document types:** Statistical/analytic code

**How to access documents:** Online database

**When available:** With publication

### Additional Information

**Who can access the data:** researchers whose proposed use of the data has been approved

**Types of analyses:** secondary analysis

**Mechanisms of data availability:** investigator support

**Any additional restrictions:** None
